# Supplementary material for: Pleistocene Landscape Dynamics Drives Lineage Divergence of a Temperate Freshwater Fish Gobio rivuloides in Coastal Drainages of Northern China
Source: MDPI journal article supplement (doi:10.3390/genes14122146), 2023-11-27
Supplement: s1 [file s1]

## SUPPLEMENTARY MATERIALS

### **Pleistocene Landscape Dynamics Drives Lineage Divergence of a Temperate Freshwater Fish *Gobio rivuloides* in Coastal Drainages of Northern China**

**Xiaomin Ni, Yun Chen, Guangmin Deng and Cuizhang Fu \***

Ministry of Education Key Laboratory for Biodiversity Science and Ecological Engineering, Coastal Ecosystems Research Station of the Yangtze River Estuary, Institute of Biodiversity Science and Institute of Eco-Chongming, School of Life Sciences, Fudan University, Shanghai 200438, China; 18110700109@fudan.edu.cn (X.N.); 20110700132@fudan.edu.cn (Y.C.); 21110700097@m.fudan.edu.cn (G.D.); czfu@fudan.edu.cn (C.F.)

\* Correspondence: czfu@fudan.edu.cn

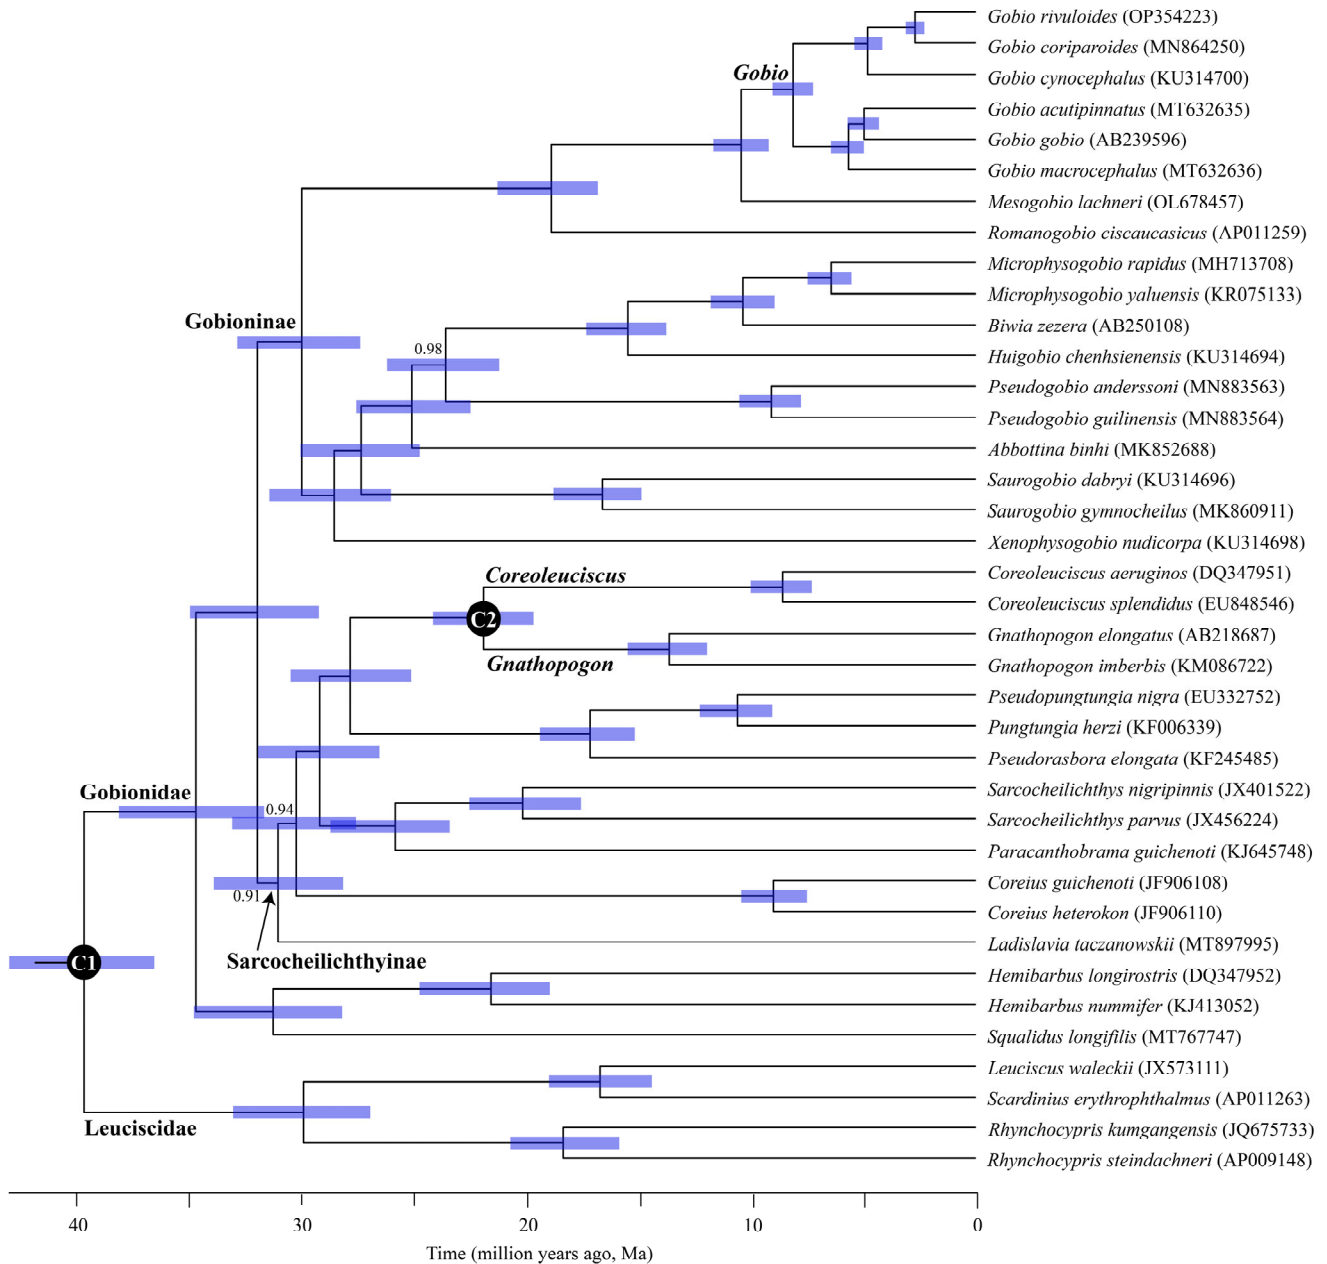

**Figure S1.** The time-calibrated Bayesian phylogeny of *Gobio rivuloides* and its close relatives inferred from 13 mitochondrial protein-coding genes. C1 and C2 are two fossil calibration points, and their detailed information is given in Table S4. The blue bars show the 95% confidence interval of divergence times. The posterior probabilities are given near the node except for one.

**Table S1.** Geography and *Cyt b* haplotype information of 34 sampling localities for *G. rivuloides*.

| Sampling locality                                                          | Coordinate        | No. | Cyt b Haplotype (No.)                                                                                            |
|----------------------------------------------------------------------------|-------------------|-----|------------------------------------------------------------------------------------------------------------------|
| <i>Yellow River</i>                                                        |                   |     |                                                                                                                  |
| 1. Wuzhong County, Ningxia Hui Autonomous Region                           | 38.03°N, 106.19°E | 3   | C01(2), C02(1)                                                                                                   |
| 2. Dengkou County, Inner Mongolia Autonomous Region                        | 40.32°N, 107.05°E | 20  | C01(14), C02(1), D01(5)                                                                                          |
| 3. Linhe District, Bayan Nur City, Inner Mongolia Autonomous Region        | 40.68°N, 107.40°E | 20  | C01(13), C02(2), C04(2), D02(3)                                                                                  |
| 4. Pianguan County, Shanxi Province                                        | 39.58°N, 111.44°E | 7   | C01(6), C02(1)                                                                                                   |
| 5. Baode County, Shanxi Province                                           | 39.03°N, 111.08°E | 24  | C01(14), C02(4), C03(1), C04(1), D01(3), D02(1)                                                                  |
| 6. Shenmu County, Shaanxi Province                                         | 38.53°N, 110.74°E | 2   | C02(2)                                                                                                           |
| 7. Loufan County, Shanxi Province                                          | 38.18°N, 111.85°E | 3   | C01(2), C05(1)                                                                                                   |
| 8. Hancheng City, Shaanxi Province                                         | 35.61°N, 110.59°E | 21  | C01(13), C02(5), C06(1), D02(2)                                                                                  |
| 9. Sanmenxia City, Henan Province                                          | 34.78°N, 111.19°E | 2   | C01(1), C02(1)                                                                                                   |
| <i>Hai River</i>                                                           |                   |     |                                                                                                                  |
| 10. Yushe County, Shanxi Province                                          | 37.14°N, 112.94°E | 11  | C05(1), C07(7), C08(3)                                                                                           |
| <i>Luan River</i>                                                          |                   |     |                                                                                                                  |
| 11. Chengde County, Hebei Province                                         | 40.77°N, 118.16°E | 10  | B01(2), B02(1), B03(1), B04(2), B05(1), B06(1), B07(1), B08(1)                                                   |
| 12. Longhua County, Hebei Province                                         | 41.27°N, 117.67°E | 1   | B09(1)                                                                                                           |
| 13. Weichang County, Hebei Province                                        | 41.95°N, 116.94°E | 14  | B04(1), B07(1), B10(1), B11(1), B12(1), B13(2), B14(1), B15(4)<br>B16(1), B17(1)                                 |
| <i>Liao River</i>                                                          |                   |     |                                                                                                                  |
| 14. Xinmin City, Liaoning Province                                         | 42.02°N, 122.85°E | 25  | B14(1), B15(13), B18(1), B19(1), B20(4), B21(1), B22(1), B23(1)<br>B24(1), B25(1)                                |
| 15. Tieling City, Liaoning Province                                        | 42.29°N, 123.84°E | 24  | B15(4), B18(3), B20(5), B24(1), B26(1), B27(1), B28(1), B29(1)<br>B30(1), B31(1), B32(2), B33(1), B34(1), B35(1) |
| <i>Amur River</i>                                                          |                   |     |                                                                                                                  |
| 16. Dunhua City, Jilin Province                                            | 43.69°N, 128.60°E | 6   | A01(1), A02(3), A03(1), A04(1)                                                                                   |
| 17. Yilan County, Heilongjiang Province                                    | 46.33°N, 129.55°E | 4   | A02(1), A05(1), A06(1), A07(1)                                                                                   |
| 18. Tonghe County, Heilongjiang Province                                   | 45.98°N, 128.81°E | 2   | A02(1), A08(1)                                                                                                   |
| 19. Tieli City, Heilongjiang Province                                      | 46.98°N, 128.04°E | 1   | A04(1)                                                                                                           |
| 20. Harbin City, Heilongjiang Province                                     | 45.54°N, 127.01°E | 10  | A01(1), A02(3), A04(1), A08(1), A09(1), A10(1), A11(1), A12(1)                                                   |
| 21. Wuchang City, Heilongjiang Province                                    | 44.93°N, 127.09°E | 4   | A02(1), A13(1), A14(1), A15(1)                                                                                   |
| 22. Songyuan City, Jilin Province                                          | 45.17°N, 124.83°E | 7   | A02(3), A09(1), A16(1), A17(1), A18(1)                                                                           |
| 23. Daan City, Jilin Province                                              | 45.55°N, 124.29°E | 1   | A04(1)                                                                                                           |
| 24. Qiqihar City, Heilongjiang Province                                    | 47.34°N, 123.92°E | 5   | A02(1), A19(1), A20(1), A21(1), A22(1)                                                                           |
| 25. Beian City, Heilongjiang Province                                      | 48.22°N, 126.53°E | 6   | A02(3), A08(1), A23(1), A24(1)                                                                                   |
| 26. Nehe City, Heilongjiang Province                                       | 48.46°N, 124.91°E | 4   | A02(1), A05(1), A25(1), A26(1)                                                                                   |
| 27. Wudalianchi City, Heilongjiang Province                                | 48.52°N, 126.20°E | 6   | A02(2), A04(2), A10(1), A15(1)                                                                                   |
| 28. Daur Autonomous Banner of Morin Dawa, Inner Mongolia Autonomous Region | 48.48°N, 124.54°E | 5   | A02(3), A27(1), A28(1)                                                                                           |
| 29. Nenjiang County, Heilongjiang Province                                 | 49.24°N, 125.24°E | 5   | A09(1), A10(2), A19(1), A29(1)                                                                                   |
| 30. Xunke County, Heilongjiang Province                                    | 49.60°N, 128.48°E | 6   | A02(3), A09(1), A30(1), A31(1)                                                                                   |
| 31. Heihe City, Heilongjiang Province                                      | 50.22°N, 127.53°E | 5   | A02(2), A10(1), A32(1), A33(1)                                                                                   |
| 32. Hailar District, Inner Mongolia Autonomous Region                      | 49.27°N, 119.78°E | 4   | A02(2), A04(1), A10(1)                                                                                           |
| 33. Manzhouli City, Inner Mongolia Autonomous Region                       | 49.38°N, 117.74°E | 8   | A02(2), A04(1), A18(1), A26(1), A34(1), A35(1), A36(1)                                                           |
| 34. Xin Barag Right Banner, Inner Mongolia Autonomous Region               | 48.65°N, 116.83°E | 10  | A02(4), A10(1), A37(1), A38(2), A39(1), A40(1)                                                                   |

**Table S2.** Primer pairs used to amplify the mitochondrial genome of *G. rivuloides*.

| Primer pair | Forward primer |                           | Reverse primer |                             | Annealing temperature | Source           |
|-------------|----------------|---------------------------|----------------|-----------------------------|-----------------------|------------------|
|             | Name           | Sequence (5'-3')          | Name           | Sequence (5'-3')            |                       |                  |
| 1           | Gob12SF        | AAGGCATGGTCCYGACCTTA      | Gob16sR        | TTCGGTAGGTCTRTCACTTC        | 55.4 °C               | [89]             |
| 2           | GobValF        | ACACCGAGAAGACATCCA        | GobLeuR        | GGAAGAGGAYTTGAACC           | 54.3 °C               | [49, 89]         |
| 3           | GobND1F        | GCAGCCGCTATTAAGGGTT       | GobND1R1       | GGRTTCATTGATGGAGGA          | 53.3 °C               | [89]             |
| 4           | SDIleF         | GCCCAAGGACCACTTTGATAG     | GobCOIR        | CCAAATACRAGATARAGGGT        | 52.5 °C               | [89]             |
| 5           | AsnF           | AGCGAGCATCCATCTACTT       | ARSerR         | GGTYATGTGACTGGCTTGA         | 54.6 °C               | [89]             |
| 6           | CGobCOIF       | TGAGAAGCCTTYGCCGCTAAAACG  | TGobATP6R      | GCTTGCTGTGCCATTARACGTTTCTTG | 52.4 °C               | [21, 89]         |
| 7           | ZXSATP6F       | AATCAACCAACMGTAGCYCT      | GobArgR        | CTGAGYCGAAATCAGAGG          | 53.3 °C               | [21, 89]         |
| 8           | GobGlyF        | CTTCCAATYATTTAGYCTTGG     | GRND4R         | CCGGCCCCAYCAGATTTTA         | 51.8 °C               | [49]; this study |
| 9           | TGobND4FS      | TAGCCAGCCAAAAYCACAT       | GobLeuR        | TGGAYTTGCACCAAGAGT          | 54.5 °C               | [21, 89]         |
| 10          | GobSerF1       | ACTYACCRAGGAAGGACA        | GobND5R        | TCCYCAGGCAAGYCGTTT          | 54.0 °C               | [89]             |
| 11          | TGobND5F       | GTAGCTTTCTCRACATC         | GobCytbR       | GGGTGDTTTTTCGTAG            | 52.8 °C               | [21]; this study |
| 12          | GobND6F        | AAAATAGGTCATAATTCTTGCTCGG | GobProR        | GTTTAATTTAGAATTCTGGCTTTGG   | 56.0 °C               | [89]             |
| 13          | HemDloopF      | AAAGCATCGGTCTTGTAATC      | HemDloopR      | CTTGGCTAGGCGTCTTGG          | 53.0 °C               | [89]             |

**Table S3.** The detailed sources of mitochondrial genomes used in this study.

| Genus                  | Species                          | Sampling site                                           | Genbank No. | References  |
|------------------------|----------------------------------|---------------------------------------------------------|-------------|-------------|
| <i>Gobio</i>           | <i>Gobio acutipinnatus</i>       | Bu'erjin, Xinjiang Uygur Autonomous Region, China       | MT632635    | [90]        |
|                        | <i>Gobio gobio</i>               | Plana, Czech Republic                                   | AB239596    | [91]        |
|                        | <i>Gobio macrocephalus</i>       | Wangqing County, Jilin Province, China                  | MT632636    | [90]        |
|                        | <i>Gobio coriparoides</i>        | Linxia Hui Autonomous Prefecture, Gansu Province, China | MN864250    | [92]        |
|                        | <i>Gobio rivuloides</i>          | Yushe County, Shanxi Province, China                    | OP354223    | this study  |
|                        | <i>Gobio cynocephalus</i>        | Jalaïd Banner, Hinggan League, Inner Mongolia, China    | KU314700    | [93]        |
| <i>Mesogobio</i>       | <i>Mesogobio lachneri</i>        | Linjiang City, Jilin Province, China                    | OL678457    | [94]        |
| <i>Romanogobio</i>     | <i>Romanogobio ciscaucasicus</i> |                                                         | AP011259    | unpublished |
| <i>Microphysogobio</i> | <i>Microphysogobio rapidus</i>   | South Korea                                             | MH713708    | [95]        |
|                        | <i>Microphysogobio yaluensis</i> | South Korea                                             | KR075133    | [96]        |
| <i>Biwia</i>           | <i>Biwia zezera</i>              | Shiga, Moriyama, Japan                                  | AB250108    | [97]        |

|                          |                                      |                                           |          |             |
|--------------------------|--------------------------------------|-------------------------------------------|----------|-------------|
| <i>Huigobio</i>          | <i>Huigobio chenhsienensis</i>       | Ningdu County, Jiangxi Province, China    | KU314694 | [93]        |
| <i>Pseudogobio</i>       | <i>Pseudogobio anderssoni</i>        | Anyi County, Jiangxi Province, China      | MN883563 | [98]        |
|                          | <i>Pseudogobio guilinensis</i>       | Pingle County, Guangxi Province, China    | MN883564 | [98]        |
| <i>Abbottina</i>         | <i>Abbottina binhi</i>               | Pingguo County, Guangxi Province, China   | MK852688 | [99]        |
| <i>Saurogobio</i>        | <i>Saurogobio dabryi</i>             | Xiushui County, Jiangxi Province, China   | KU314696 | [93]        |
|                          | <i>Saurogobio gymnocheilus</i>       | Hengdong County, Hunan Province, China    | MK860911 | [100]       |
| <i>Xenophysogobio</i>    | <i>Xenophysogobio nudicorpa</i>      | Jiangjin District, Chongqing City, China  | KU314698 | [93]        |
| <i>Coreoleuciscus</i>    | <i>Coreoleuciscus aeruginos*</i>     | South Korea                               | DQ347951 | [101]       |
|                          | <i>Coreoleuciscus splendidus</i>     | South Korea                               | EU848546 | [101]       |
| <i>Gnathopogon</i>       | <i>Gnathopogon elongatus</i>         |                                           | AB218687 | [91]        |
|                          | <i>Gnathopogon imberbis</i>          |                                           | KM086722 | [102]       |
| <i>Pseudopungtungia</i>  | <i>Pseudopungtungia nigra</i>        | South Korea                               | EU332752 | [103]       |
| <i>Pungtungia</i>        | <i>Pungtungia herzi</i>              | South Korea                               | KF006339 | [104]       |
| <i>Pseudorasbora</i>     | <i>Pseudorasbora elongata</i>        | Wuyuan County, Jiangxi Province, China    | KF245485 | [105]       |
| <i>Sarcocheilichthys</i> | <i>Sarcocheilichthys nigripinnis</i> | Kaihua County, Zhejiang Province, China   | JX401522 | [106]       |
|                          | <i>Sarcocheilichthys parvus</i>      | Yongjia County, Zhejiang Province, China  | JX456224 | [107]       |
| <i>Paracanthobrama</i>   | <i>Paracanthobrama guichenoti</i>    |                                           | KJ645748 | [108]       |
| <i>Coreius</i>           | <i>Coreius guichenoti</i>            | Banan District, Chongqing City, China     | JF906108 | [109]       |
|                          | <i>Coreius heterokon</i>             | Banan District, Chongqing City, China     | JF906110 | [109]       |
| <i>Ladislavia</i>        | <i>Ladislavia taczanowskii</i>       | Kuandian County, Liaoning Province, China | MT897995 | [110]       |
| <i>Hemibarbus</i>        | <i>Hemibarbus longirostris</i>       | Ganwon-do, South Korea                    | DQ347952 | [111]       |
|                          | <i>Hemibarbus nummifer</i>           | Wuyishan City, Fujian Province, China     | KJ413052 | [112]       |
| <i>Squalidus</i>         | <i>Squalidus longifilis</i>          | Fengcheng City, Liaoning Province, China  | MT767747 | [89]        |
| <i>Rhynchocypris</i>     | <i>Rhynchocypris steindachneri</i>   | Yamagata, Japan                           | AP009148 | [113]       |
|                          | <i>Rhynchocypris kumgangensis</i>    | Gangwon Province, Korea                   | JQ675733 | [114]       |
| <i>Leuciscus</i>         | <i>Leuciscus waleckii</i>            | Inner Mongolia, China                     | JX573111 | [115]       |
| <i>Scardinius</i>        | <i>Scardinius erythrophthalmus</i>   |                                           | AP011263 | unpublished |

\* The scientific name in Genbank is *Coreoleuciscus splendidus*, and Song and Bang [116] revised it as *Coreoleuciscus aeruginos*.

**Table S4.** Sources, stratigraphic information, and parameter setting of two fossil species used in this study.

| Fossil species                            | Code | Age of stratigraphy | BEAUti parameter |      |        |
|-------------------------------------------|------|---------------------|------------------|------|--------|
|                                           |      |                     | M                | S    | Offset |
| + <i>Palaeogobio zhongyuanensis</i> [117] | C1   | 50.5–42.0 Ma [118]  | 3.82             | 0.05 | 0      |
| + <i>Gnathopogon macrocephala</i> [117]   | C2   | 20.4–15.0 Ma [119]  | 2.86             | 0.08 | 0      |

**Table S5.** Information of parameters and priors for scenarios tested using DIYABC.

| Scenarios                 | Parameter                                     | Distribution | Interval                           | Constraint |
|---------------------------|-----------------------------------------------|--------------|------------------------------------|------------|
| Scenario I (CON model)    | N0: the most recent effective population size | Uniform      | 10 <sup>2</sup> –3×10 <sup>6</sup> |            |
| Scenario II (DEC model)   | N0: the most recent effective population size | Uniform      | 10 <sup>2</sup> –3×10 <sup>6</sup> | N1>N0      |
|                           | N1: the large effective population size       | Uniform      | 10 <sup>2</sup> –3×10 <sup>6</sup> |            |
|                           | T1: time of bottleneck effect                 | Uniform      | 10 <sup>2</sup> –3×10 <sup>6</sup> |            |
| Scenario III (INC model)  | N0: the most recent effective population size | Uniform      | 10 <sup>2</sup> –3×10 <sup>6</sup> | N2<N0      |
|                           | N2: the small effective population size       | Uniform      | 10 <sup>2</sup> –3×10 <sup>6</sup> |            |
|                           | T1: time of population expansion              | Uniform      | 10 <sup>2</sup> –3×10 <sup>6</sup> |            |
| Scenario IV (INDEC model) | N0: the most recent effective population size | Uniform      | 10 <sup>2</sup> –3×10 <sup>6</sup> | N3>N0      |
|                           | N3: the large effective population size       | Uniform      | 10 <sup>2</sup> –3×10 <sup>6</sup> |            |
|                           | T2: time of bottleneck effect                 | Uniform      | 10 <sup>2</sup> –3×10 <sup>6</sup> |            |
| Scenario V (DEINC model)  | T3: time of population expansion              | Uniform      | 10 <sup>2</sup> –3×10 <sup>6</sup> |            |
|                           | N0: the most recent effective population size | Uniform      | 10 <sup>2</sup> –3×10 <sup>6</sup> | N4<N0      |
|                           | N4: the small effective population size       | Uniform      | 10 <sup>2</sup> –3×10 <sup>6</sup> |            |
|                           | N5: the large effective population size       | Uniform      | 10 <sup>2</sup> –3×10 <sup>6</sup> | T3>T2      |
|                           | T2: time of population expansion              | Uniform      | 10 <sup>2</sup> –3×10 <sup>6</sup> |            |
|                           | T3: time of bottleneck effect                 | Uniform      | 10 <sup>2</sup> –3×10 <sup>6</sup> |            |

**Table S6.** Model comparison for ancestral area reconstruction of *G. rivuloides* implemented in BioGeoBEARS. The best-fitting model is in bold.

| Model         | LnL           | Numparams | Dispersal   | Extinction      | Founder event speciation | AIC           | AIC_wt          |
|---------------|---------------|-----------|-------------|-----------------|--------------------------|---------------|-----------------|
| DEC           | -62.64        | 2         | 0.13        | 1.00E-12        | 0.00E+00                 | 129.30        | 3.80E-02        |
| <b>DEC+J</b>  | <b>-58.66</b> | <b>3</b>  | <b>0.06</b> | <b>1.00E-12</b> | <b>8.70E-03</b>          | <b>123.30</b> | <b>7.50E-01</b> |
| DIVALIKE      | -63.54        | 2         | 0.19        | 1.00E-12        | 0.00E+00                 | 131.10        | 1.60E-02        |
| DIVALIKE+J    | -60.02        | 3         | 0.08        | 1.00E-12        | 1.10E-02                 | 126.00        | 1.90E-01        |
| BAYAREALIKE   | -84.94        | 2         | 0.01        | 1.70E+00        | 0.00E+00                 | 173.90        | 7.90E-12        |
| BAYAREALIKE+J | -66.55        | 3         | 0.05        | 1.00E-07        | 1.70E-02                 | 139.10        | 3.00E-04        |

**Table S7.** Posterior probability with 95% confidence interval in bracket for each scenario in DIYABC analyses. The highest posterior probability is in bold.

| Lineage/Sub-lineage | Scenario I : CON       | Scenario II: DEC       | Scenario III: INC             | Scenario IV: INDEC            | Scenario V: DEINC             |
|---------------------|------------------------|------------------------|-------------------------------|-------------------------------|-------------------------------|
| Sub-lineage I-A     | 0.0025 [0.0000,0.0107] | 0.0021 [0.0000,0.0104] | 0.4250 [0.4137,0.4362]        | 0.0025 [0.0000,0.0108]        | <b>0.5679 [0.5567,0.5791]</b> |
| Sub-lineage I-B     | 0.0056 [0.0048,0.0063] | 0.0044 [0.0038,0.0050] | <b>0.9805 [0.9787,0.9823]</b> | 0.0055 [0.0048,0.0062]        | 0.0041 [0.0035,0.0046]        |
| Lineage II          | 0.2212 [0.2162,0.2262] | 0.3333 [0.3277,0.3390] | 0.0442 [0.0400,0.0485]        | <b>0.3480 [0.3425,0.3536]</b> | 0.0532 [0.0489,0.0574]        |
